# Supplementary material
Source: publisher figshare collection journal article supplement (https://gsapubs.figshare.com/ndownloader/files/23294159)
Supplement: Supplementary file 1 [file 23294159]

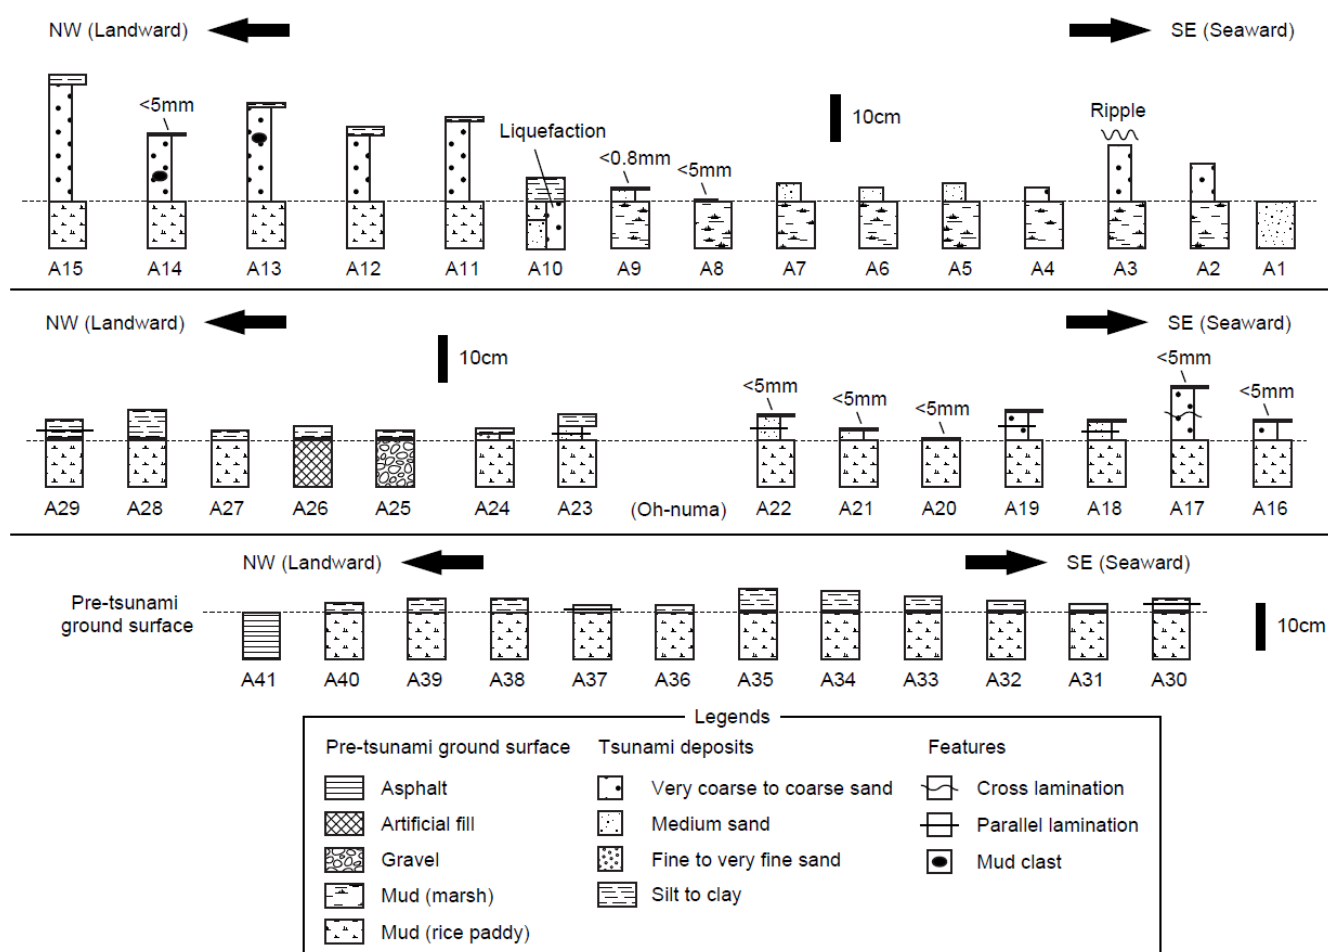

Fig. 10. Columnar sections of the tsunami deposit along survey transect.

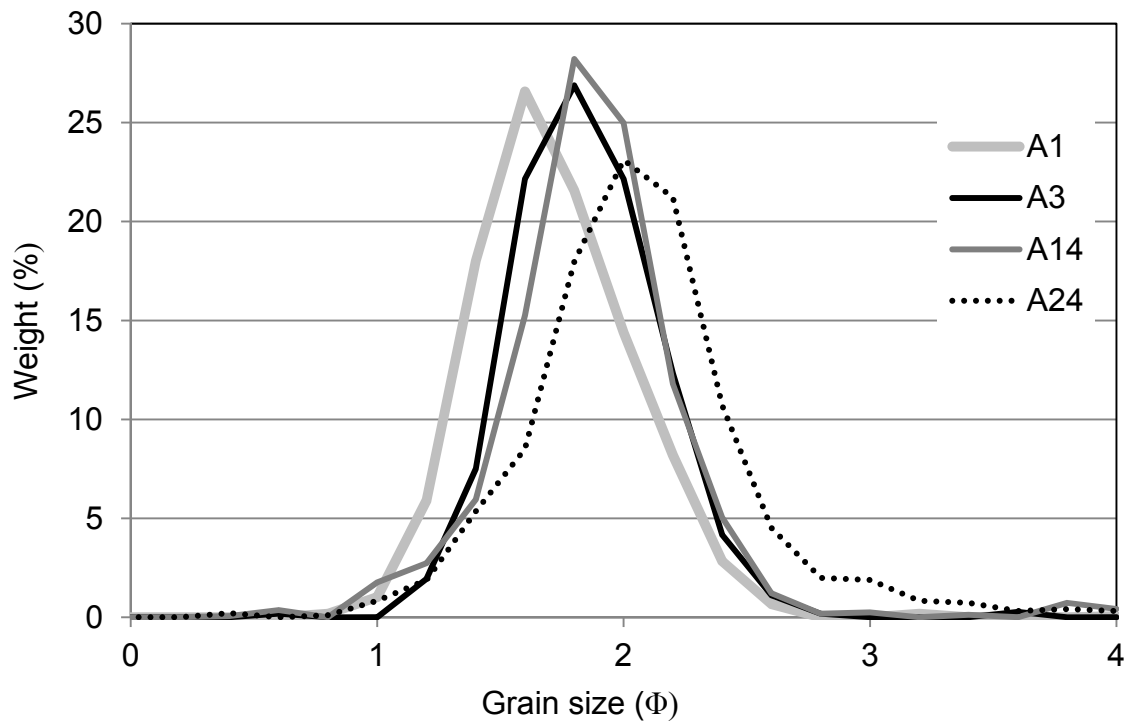

Fig. 7. Grain size distributions of sand deposits at A1 (beach sand, 0.5 km from the shoreline), A3 (2.5 km from the shoreline), A14 (1.35 km from the shoreline), and A24 (2.35 km from the shoreline) along the transect.
